# Supplementary material
Source: Springer Nature journal article supplement (https://www.springermedizin.de/resource/supplementary/12885_2011_2646_MOESM1_ESM.pdf/9461620)

## Local treatment

Treat existing melanoma brain metastases with surgical excision and/or stereotactic radiosurgery

- consent to study
- confirm eligibility

## Randomisation

Stratified by

- Number of brain metastases(1,>1)
- Presence or absence of extracranial disease
- Centre
- Gender
- Planned radiotherapy dose (30Gy/10# or higher)
- Age (<65, ≥65 years)

### WBRT

(at least 30 Gy over 10#)

### Observation only

Follow Up and Outcome Assessment

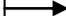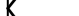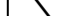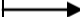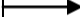

Supplement: MOESM1 [file 9461620]
